# Supplementary material
Source: PubMed Central journal article supplement (PMC2872677)
Supplement: NIHMS159299-supplement-4_si_004.pdf [file NIHMS159299-supplement-4_si_004.pdf]

Supporting information for

# Computational identification of slow conformational fluctuations in proteins

Arvind Ramanathan,<sup>1,2</sup> Pratul K. Agarwal<sup>2,\*</sup>

<sup>1</sup>Joint CMU-Pitt Program in Computational Biology, Carnegie Mellon University

<sup>2</sup>Computational Biology Institute, and Computer Science and Mathematics Division,  
Oak Ridge National Laboratory, Oak Ridge National Laboratory, Oak Ridge, TN 37831

**\*Corresponding Author:**

Pratul K. Agarwal, Oak Ridge National Laboratory,

P.O. Box 2008, MS 6016, Oak Ridge, TN 37831;

Phone: (865) 574-7184; Fax: (865) 576-5491; E-mail: agarwalpk@ornl.gov

**Table S1: Summary of starting PDB structures used for detailed molecular dynamics simulations.** These crystal structures were chosen for showing diverse binding partners and also having sufficient structural diversity. RMSD was computed for the backbone of each of the structures to 1UBQ (base structure). The summary of structural changes describes areas highly flexible from the ensemble, as observed by structural overlaps against 1UBQ.

| Structure | Chain | RMSD (Å) | Regions with structural changes                                   |
|-----------|-------|----------|-------------------------------------------------------------------|
| 1UBQ      | A     | -        | -                                                                 |
| 1P3Q      | U     | 0.417    | $\beta$ 1- $\beta$ 2, $\beta$ 3- $\beta$ 4                        |
| 1S1Q      | B     | 0.501    | $\beta$ 1- $\beta$ 2, $\beta$ 3- $\beta$ 4, $\beta$ 2- $\alpha$ 1 |
| 1TBE      | B     | 0.528    | $\alpha$ 1- $\beta$ 3, $\beta$ 1- $\beta$ 2, $\beta$ 3- $\beta$ 4 |
| 1YIW      | A     | 0.574    | $\alpha$ 1- $\beta$ 3, $\beta$ 1- $\beta$ 2, $\beta$ 3- $\beta$ 4 |
| 2D3G      | A     | 0.380    | $\beta$ 1- $\beta$ 2, $\beta$ 3- $\beta$ 4                        |
| 2FCQ      | B     | 0.568    | $\beta$ 1- $\beta$ 2, $\beta$ 3- $\beta$ 4                        |
| 2G45      | B     | 0.570    | $\beta$ 1- $\beta$ 2, $\beta$ 3- $\beta$ 4                        |

### **Animation movies**

The following movies are available with this document in MPEG format: Animation movies of Modes 1, 2 and 3 (corresponding to lowest eigenvalue, second lowest eigenvalue and third lowest eigenvalue) computed from QHA<sub>0.5μs</sub>, NMR and X-ray ensembles.
